# Supplementary figures and images for: Spatiotemporal Prescribed Fire Patterns in Washington State, USA
Source: MDPI journal article supplement (doi:10.3390/fire4020019), 2021-04-23

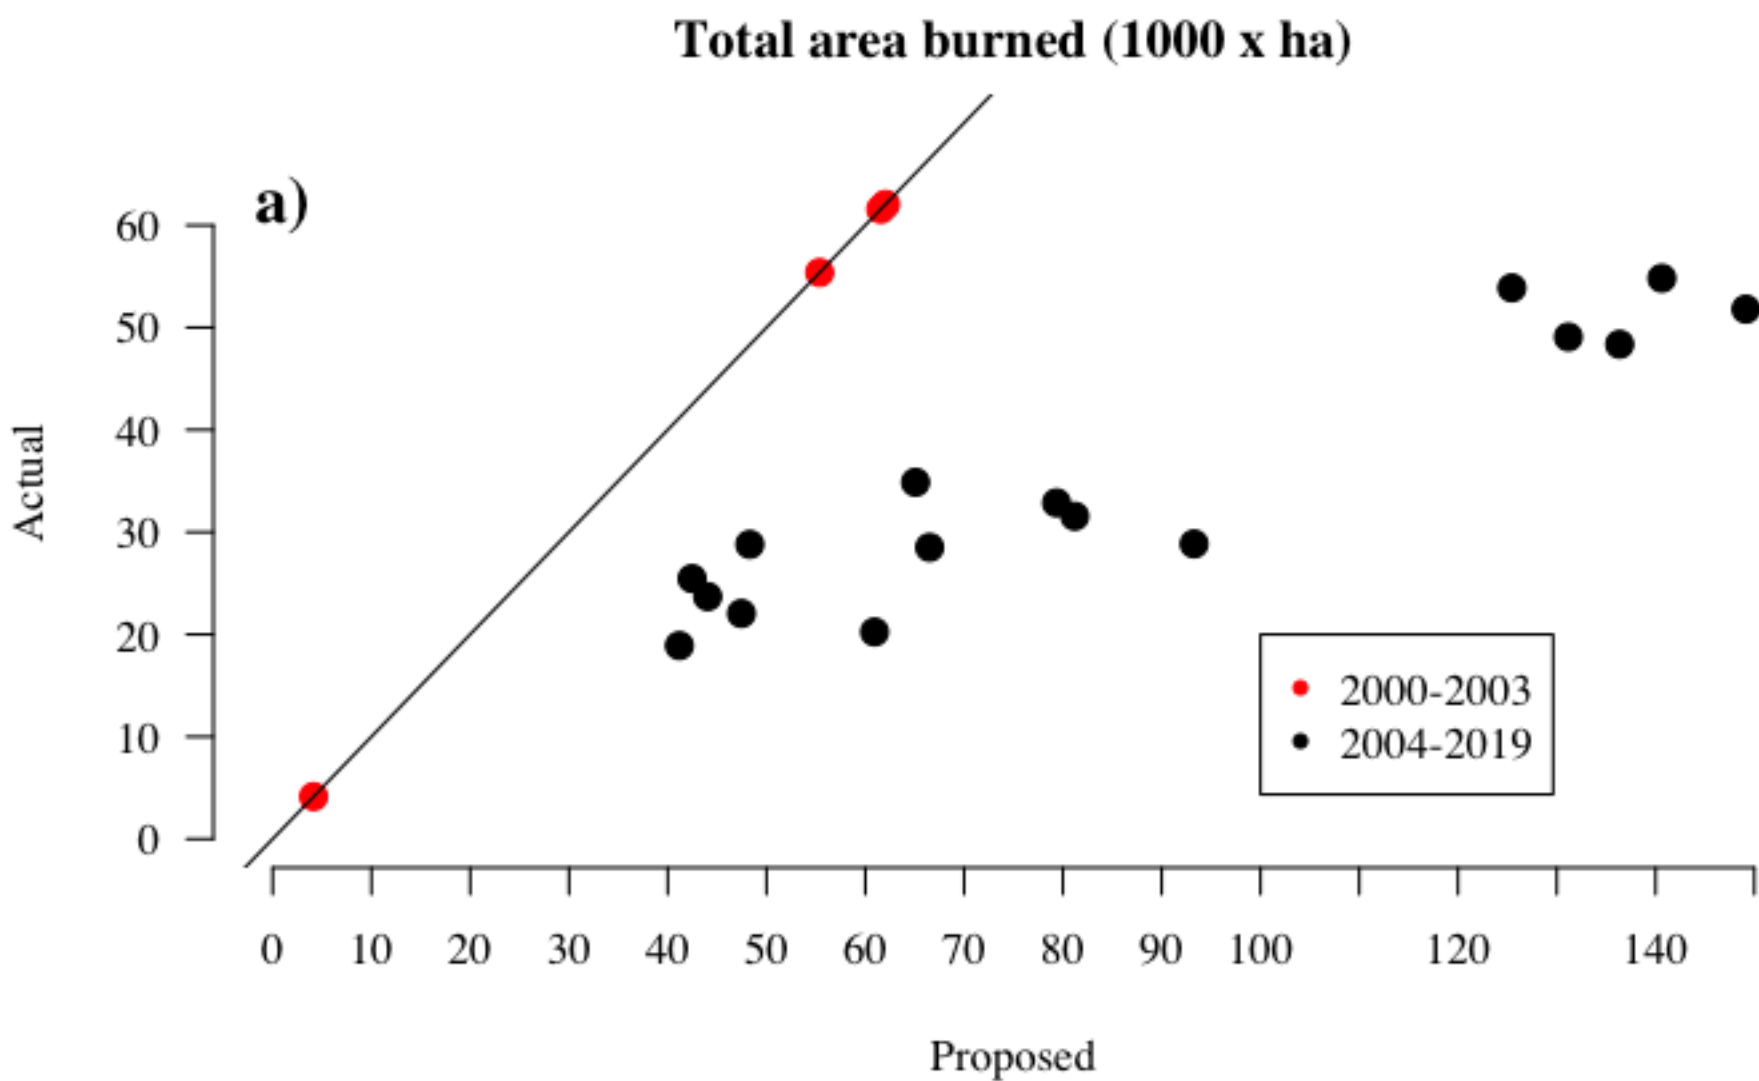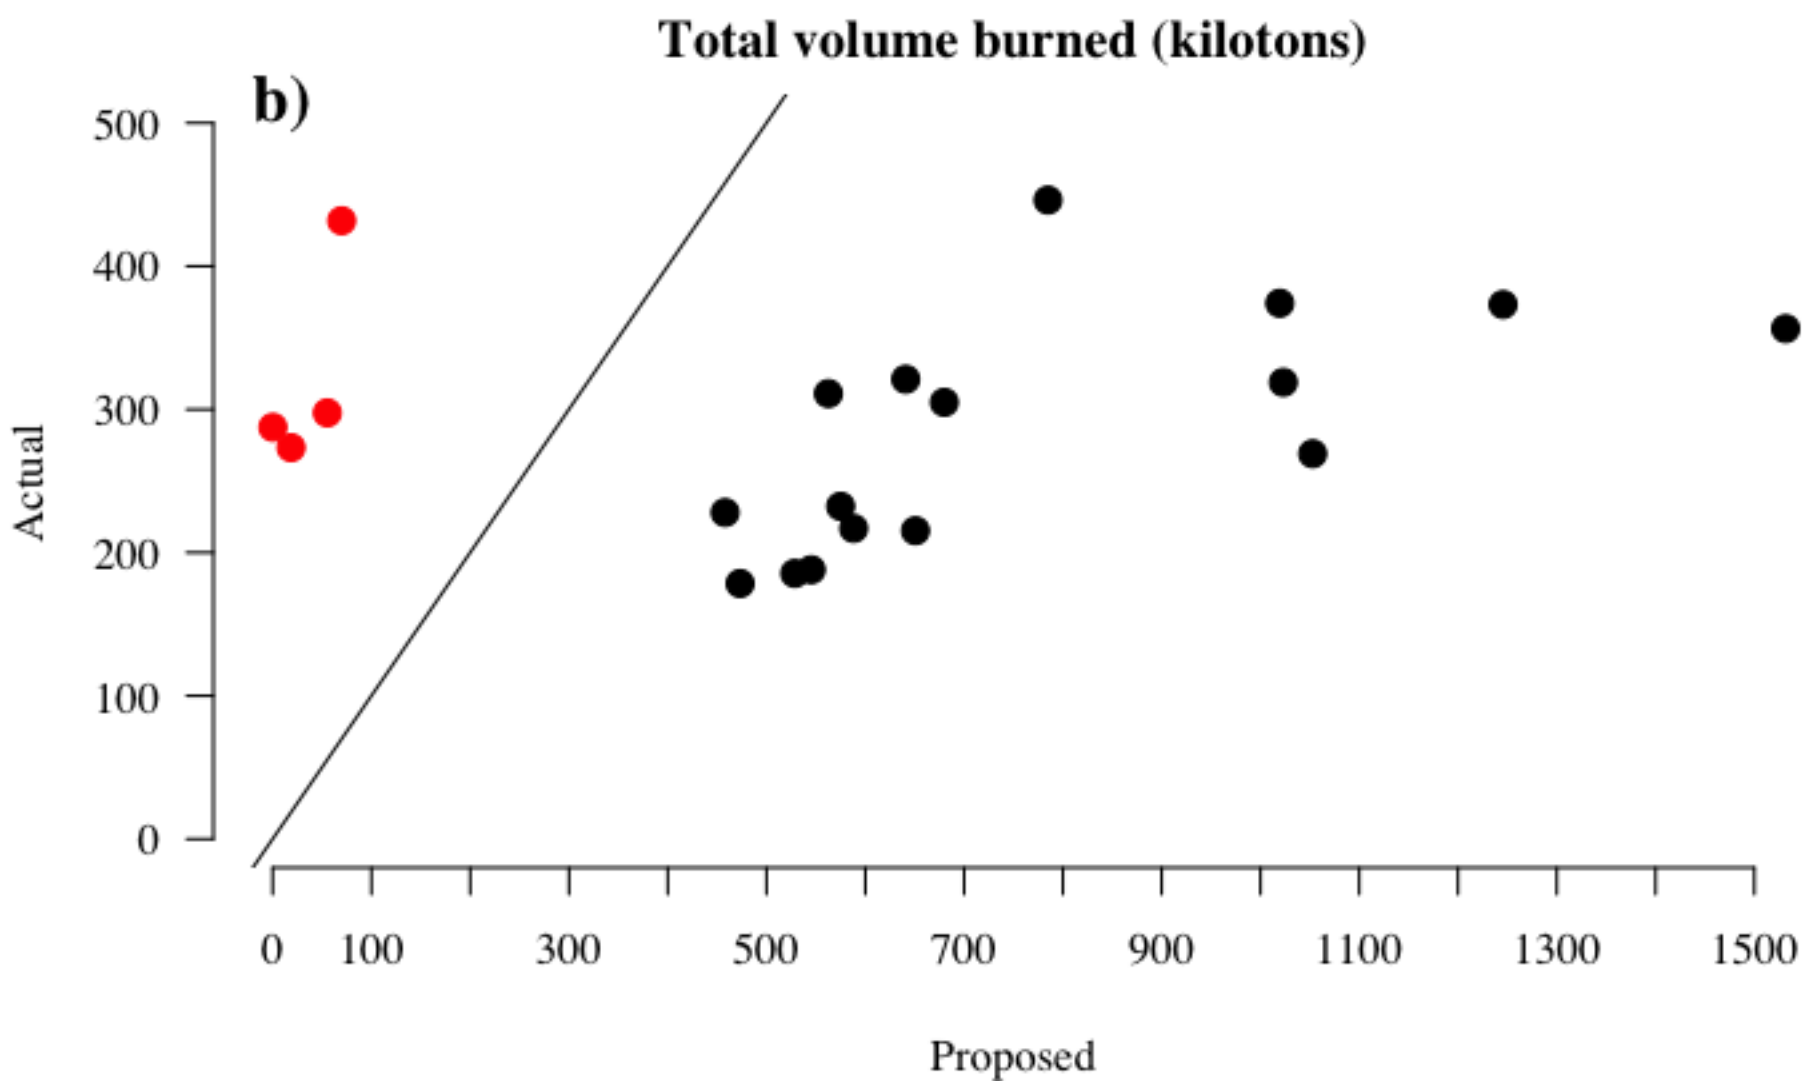

Supplement: s1 [file s1]

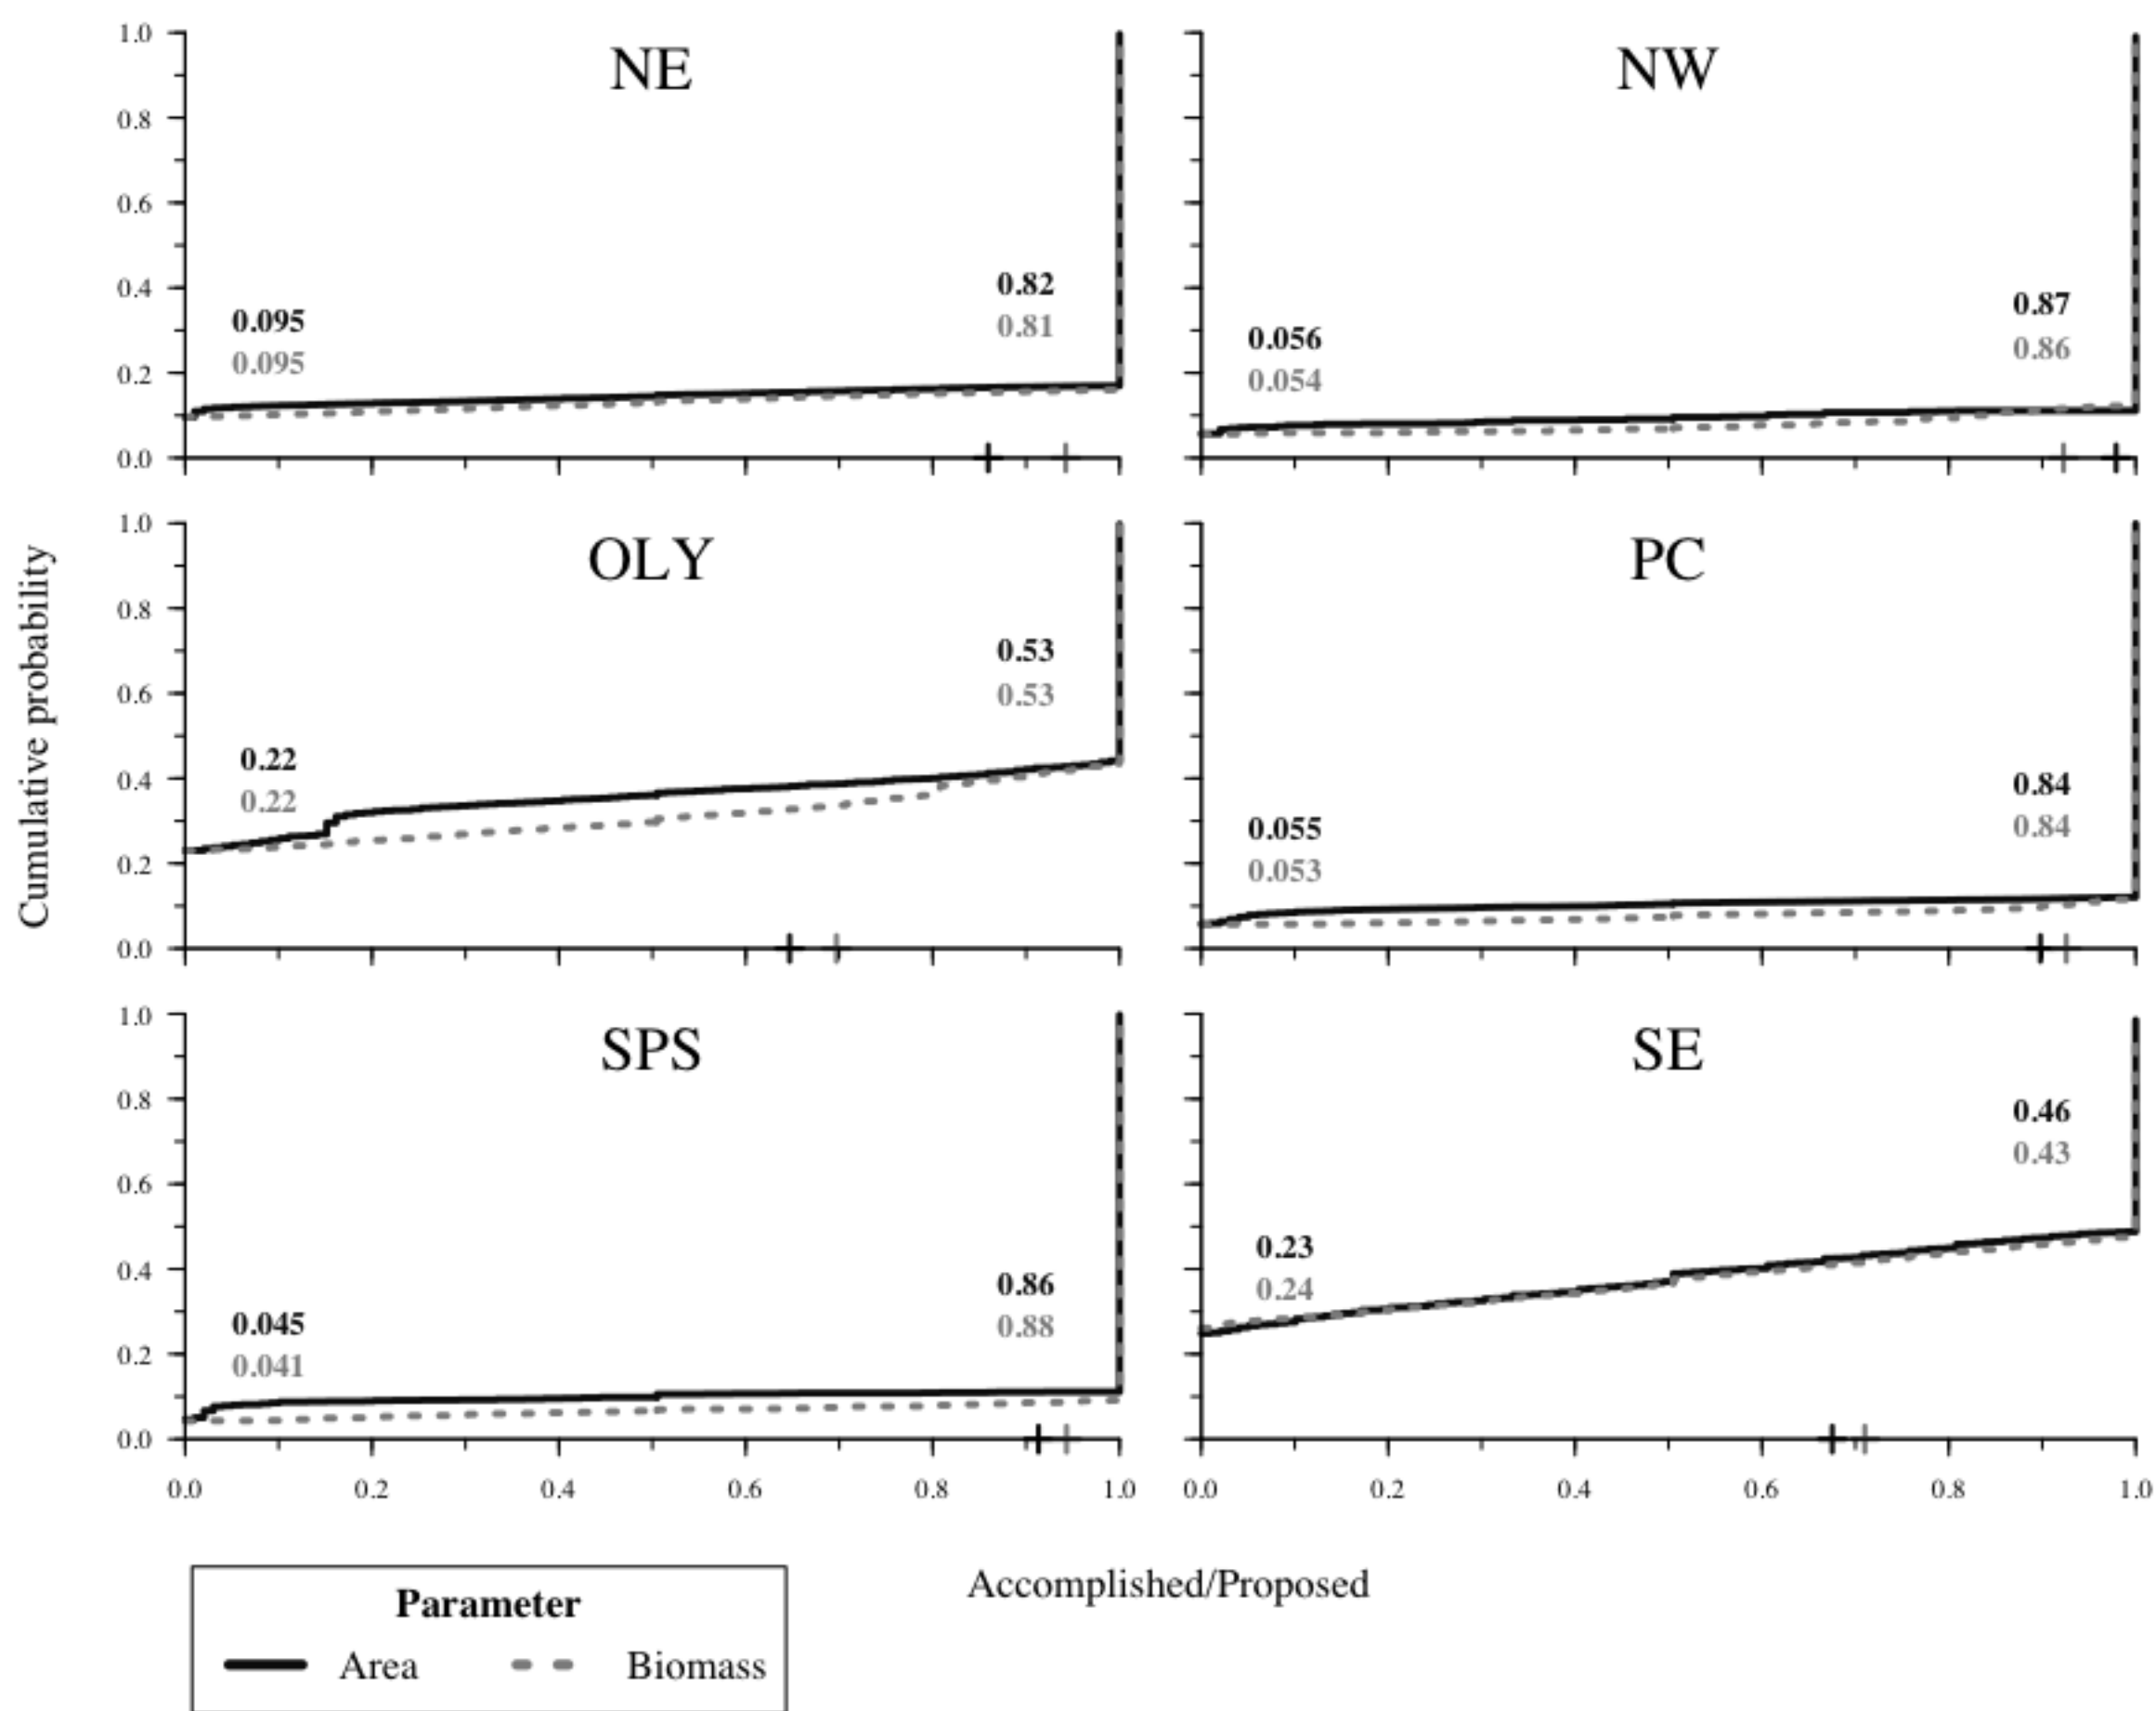

Supplement: s1 [file s1]

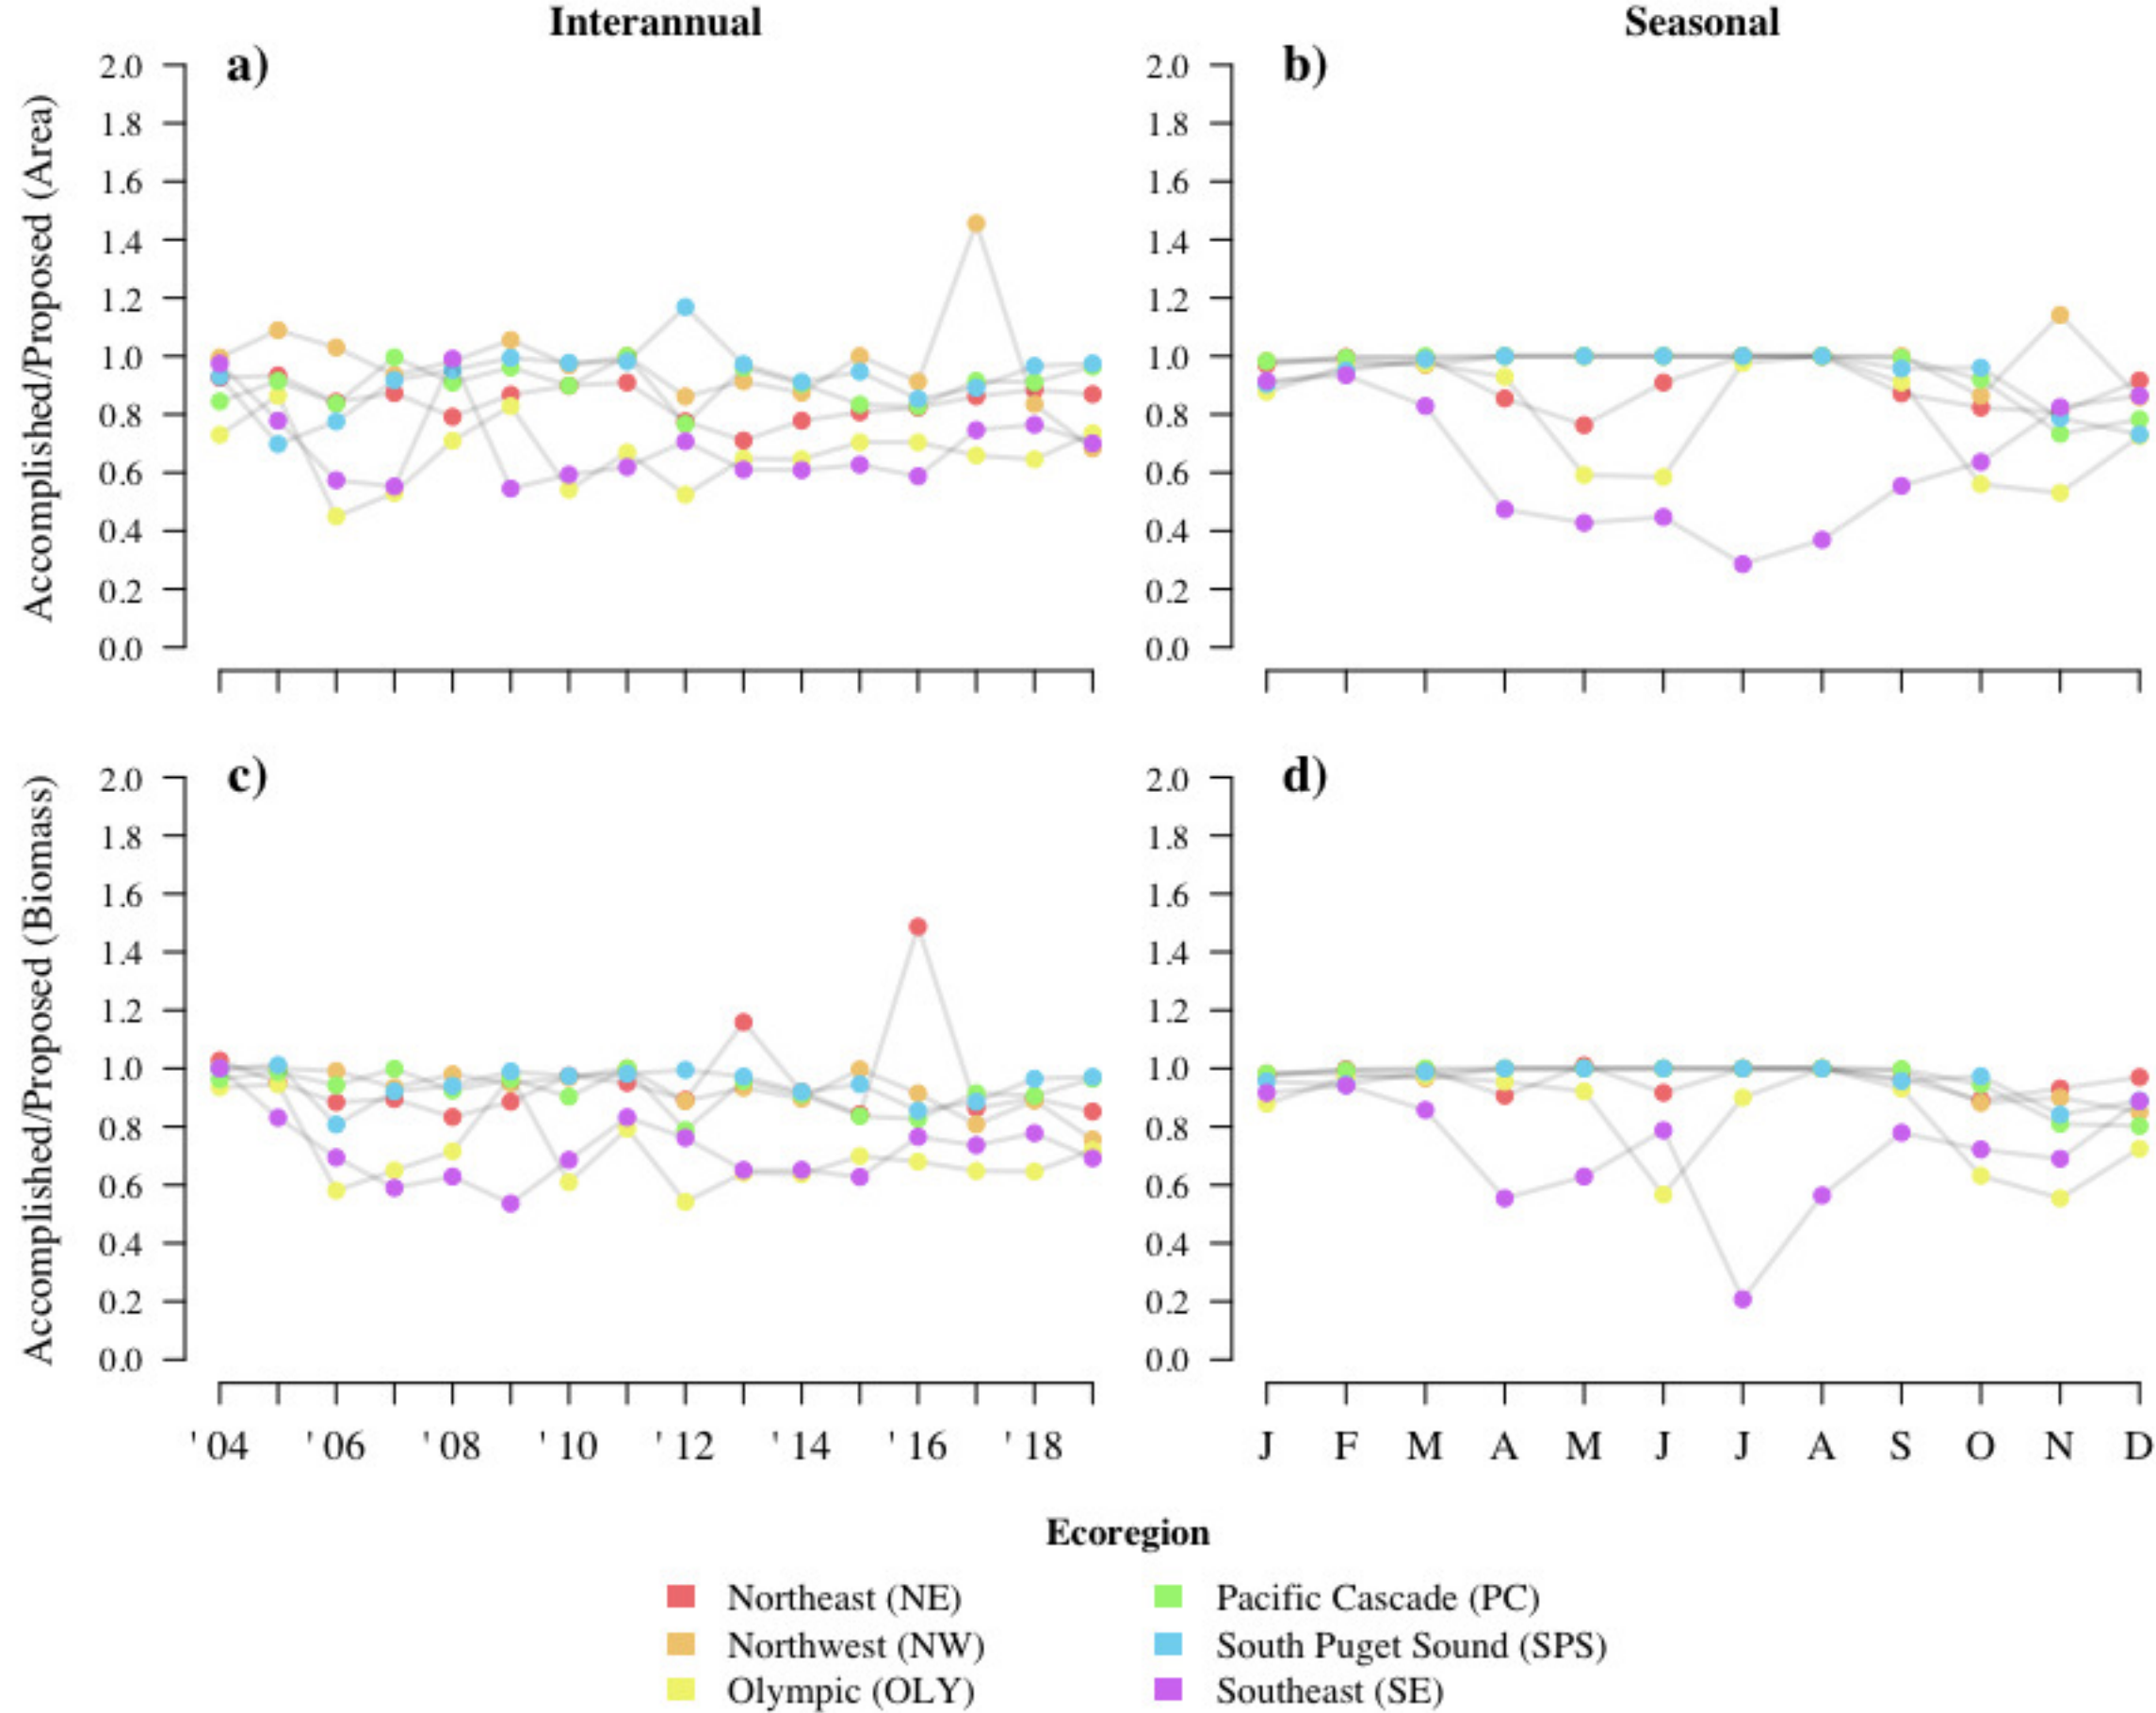

Supplement: s1 [file s1]

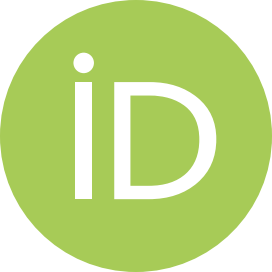

Supplement: s1 [file s1]
